# Supplementary material
Source: publisher figshare collection journal article supplement (https://sage.figshare.com/ndownloader/files/17961599)
Supplement: Supplementary file 1 [file 17961599]

**Appendix 1**

**Interview guide for students**

**The questionnaire**

- How did you experience filling out the questionnaire?
- Was anything unclear or difficult to understand?
- Did you find it helpful?
- Were there any question you think were uncomfortable to answer? (Such as questions concerning violence or bullying.)
- Were there any question you missed? (For example, regarding the environment in class/school.)
- What do you think was good about the questionnaire? (For example, was it useful to fill out the questionnaire before the consultation?)
- Do you have suggestions for what could have improved it?

**The Consultation**

- How did you experience the consultation?
- How did you experience talking about issues covered by the questionnaire? Your answer may consider also difficult topics such as violence or bullying. If you have *not* answered that you are were bullied or have experienced violence, did you want to talk about it?
- Did you experience that you talked about what you wanted to talk about? For example, was there any topic not covered in the questionnaire you wanted to talk about?
- To what extent did you benefit from the consultation? For example, was it a positive experience, and would you change anything in your life?
- What do you think was positive about good with the consultation?
- Do you have any suggestions for questions that could have been posed differently? If yes: how?

**Appendix 2.**

**Interview guide for school nurses**

**Use of the questionnaire**

- How did you inform parents/teachers/students that you would like to use a questionnaire?
- How did you organize the students’ questionnaire?
- Did you receive feedback on time spent on completing the questionare?
  - that something was unclear or difficult to understand?
  - whether any questions were uncomfortable to answer?
  - whether there were any questions that were missing?
  - whether there was anything that was good with the questionnaire?
  - Suggestions for improvements?
- How did you go through the questionnaires and answers afterwards?
  - as a basis for the consultation?
  - as feedback to the school/class teacher?
  - as feedback to students and parents?
- If you have used a questionnaire earlier, how was it different from this one?
- Is there anything else you would like to include in this questionnaire?

**Implementation of the consultation**

- How did you prepare for the consultation?
- What criteria did you use to determine the organization of the consultations?
- How many consultations per day do you think is ideal, and how much time should be allocated to each student?
- Describe one or more consultation you have had.
- Can you describe some factors that may increase the possibility of a successful consultation?
- What follow-up was conducted after the consultation? (Mention some examples.)

What benefit did you receive from the training in advance and from the guide?
